# Supplementary figures and images for: Determinants in HIV-1 Nef for enhancement of virus replication and depletion of CD4+ T lymphocytes in human lymphoid tissue ex vivo
Source: Springer Nature journal article supplement (doi:10.1186/1742-4690-6-6), 2009-01-15

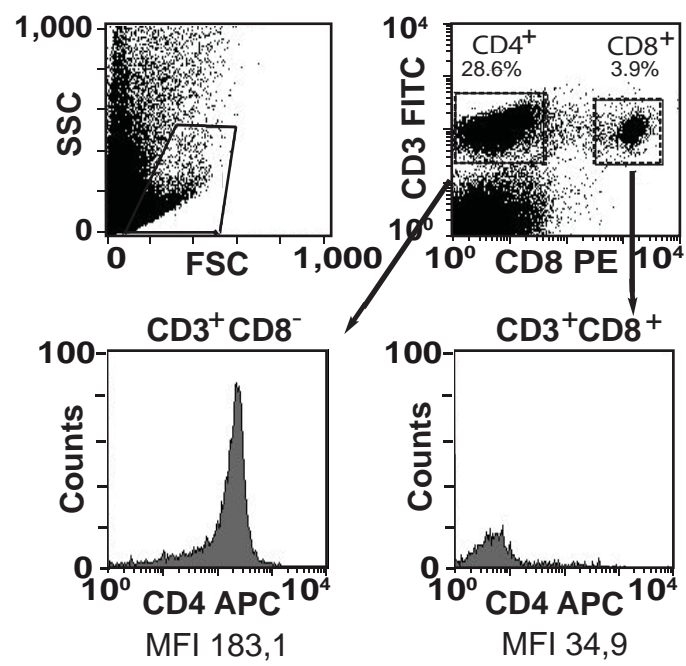

Supplemental Figure 1 Homann et al.

Supplement: Additional file 1 [file 1742-4690-6-6-s1.pdf]
